# Supplementary material for: Diagnostic properties of natriuretic peptides and opportunities for personalized thresholds for detecting heart failure in primary care
Source: publisher site journal article supplement (doi:10.1515/dx-2023-0089), 2023-09-05
Supplement: Supplementary file 1 [file j_dx-2023-0089_suppl_001.docx]

**Supplemental material**

**Supplemental Figure S1: Differences between NT-proBNP and BNP.**

| **Peptide** | NTP-proBNP | BNP |
| --- | --- | --- |
| **Activity** | Inactive prohormone | Active hormone |
| **Half-life(34)** | 120 minutes | 20 minutes |
| **Stability with addition of EDTA(34)** | 72 hours | 24 hours |
| **Cut-off ESC & NHG (1)** | 125 ng/L | 35 ng/L |
| **Cut-off NICE (12)** | 400 ng/L | N/A |

Abbrevations: EDTA, Ethylene-diamine-tetra-acetic acid; ESC, European society of cardiology; NHG, Nederlands Huisartsen Genootschap; NICE, National Institute for Health and Care Excellence; N/A= Not available.

BNP and NT-proBNP are excreted by cardiomyocytes in the ventricles in response to stretching of the cardiac walls. This can be caused by increased ventrical blood volume, as seen in HF. Consequently, BNP and NT-proBNP can be used in the diagnosis and screening of HF. BNP and NT-proBNP are two of multiple natriuretic peptides (NPs). BNP is an active hormone that induces the excretion of sodium in the kidneys and has a decreasing effect on blood pressure. NT-proBNP is a rest product of the inactive prohormone, proBNP. BNP and NT-proBNP are strongly related and are considered equally performant according to Dutch guidelines, nevertheless are not interchangeable. NT-proBNP is more stable and its half-life is up to six times longer than that of BNP. Moreover, with longer stability of blood samples when EDTA is added, NT-proBNP appears to be better suitable for primary care analysis.

In the Netherlands the same diagnostic cut-off values for NPs are used for each patient suspected of having chronic HF (BNP: 35 ng/L = 10 pmol/L and NT-proBNP: 125 ng/L = 15pmol/L). (1) However, as population characteristics and the intended purpose of NP measurement differ, there is no consensus on one optimal diagnostic threshold that is globally applicable to detect HF. The Dutch cut-offs are based on the guideline proposed by the European society of cardiology (ESC). In choosing a cut-off the ESC focused on a high sensitivity in order to rule out HF. As a consequence a high negative predictive value, but a low positive predictive value is obtained. This results in a large amount of unnecessary additional diagnostic evaluations, leading to a delay in finding alternative diagnoses and higher costs of care. To prevent this it would be beneficial to attempt improving accuracy of NP-level interpretation. Since BNP and NT-proBNP levels can be influenced by multiple causes such as age, other cardiovascular diseases, usage of anti-hypertensive medication, or renal dysfunction, their diagnostic accuracy in predicting HF is suboptimal when no correction for these factors is implemented (35).

**Supplemental Figure S2.** **Patient selection process.** BNP measurements in blue on the left side and NT-proBNP measurements in green on the right side.

**Supplemental Table S1. description of ICPC and laboratory codes**

| **Disease** | **ICPC code** | **Description of ICPC code** |
| --- | --- | --- |
| Atrial fibrillation | K78 | Atrial fibrillation/Atrial flutter |
| Coronary heart disease | K74.01  K74.02 | Angina Pectoris (unstable)  Angina Pectoris (stable) |
| Chronic kidney disease | U99.01 | Renal insufficiency/Renal impairment |
| COPD | R91  R95 | Chronic Bronchitis  COPD/Emphysema |
| Diabetes Mellitus | T90.01  T90.02 | Diabetes mellitus type 1  Diabetes mellitus type 2 |
| Heart Failure | K77  K84.03 | Decompensatio Cordis  Cardiomyopathy |
| Hypertension | K86  K87 | Essential Hypertension  Essential Hypertension with organ Damage/Secondary hypertension |
| Myocardial infarction | K75  K76.02 | Acute MI  History of MI (>4 weeks) |
| Obesity | T82  T83 | Obesity  Overweight |
| Valvular heart disease | K83 | Non rheumatic valvular disease  (aortic stenosis/Mitral insufficiency) |
| **Symptoms** | **ICPC code** | **Description of ICPC code** |
| Chest pain | K01    R01  L04 | Chest pain with cardiac origin  Pulmonary/airway pain  Complaints of thorax |
| Dizziness | N17.02 | Lightheadedness |
| Dyspnoea (shortness of breath) | K02  R02 | Thoracic pressure with cardiac origin  Dyspnea with pulmonary origin |
| Fatigue | A04 | Fatigue/weakness |
| Palpitations | K04  K05 | Palpitations  Irregular heart rhythm |
| Peripheral oedema | K07 | Oedema of ankles |
| Syncope | A06 | Fainting/syncope |
| **Laboratory measurements** | **Code** | **Description of code** |
| BNP | 1966  *3850* | brain natriuretic peptide (BNP)  *brain naturetic peptide (BNP) POC-test* |
| NT-proBNP | 1968  *3851* | NT pro brain natr. (NT-proBNP)  *NT pro brain natr. (NT-proBNP) POC-test* |

BNP, brain natriuretic peptide; COPD, chronic obstructive pulmonary disease; ICPC, International Classification of Primary Care; MI, myocardial infarction; NT-proBNP, N-terminal proBNP; POC, point-of-care.

**Supplemental Table S2. Identification of determinants for personalized thresholds – Step 1: NP altering factors as described by the Heart Failure Association of the ESC (1).**Causes in random order, followed by effect of cause on natriuretic peptides, a statistical example of effect with corresponding citation and lastly prevalence and registration rate in the ANHA cohort (described as low or high).

| Cause | Effect | Statistical example from literature | Prevalence and registration in ANHA cohort |
| --- | --- | --- | --- |
| Age | Levels increase with age | Regression coefficient per year of increase: 0.020(SD0.004)p<0.0001  0.024(SD0.003)p<0.0001(36) | High |
| Sex | Higher levels found in women | Regression coefficient for female sex:  0.294(SD0.069)p<0.0001  0.632(SD0.053)p<0.0001(36) | High |
| Obesity | Levels decrease with higher BMI | 1.8- to 4.8-fold increase in the odds of having low plasma natriuretic peptide levels.(37) | High |
| Renal dysfunction | Higher levels in lower eGFR, greater effect on NT-proBNP than BNP | To maintain optimal diagnostic performance, the cut-off concentrations for detecting HF may need to be raised when estimated glomerular filtration rate (eGFR) is <60 mL/min.(35) | High |
| Atrial arrhythmias | Higher levels found in AF | AF is associated with increased plasma natriuretic peptide (MR-proANP, BNP and NT-proBNP) levels in the absence of HF. The diagnostic performance of all three peptides is impaired by AF.(38) | High |
| Hypertension | Higher levels found in hypertension | “Hypertension can thus be a confounding factor that potentially decreases the specificity of NT-proBNP levels for the diagnosis of heart failure.”(39) | High |
| Valvular heart disease | Higher levels found in VHD | Different effects for different types of valvular disease. (40) | High |
| Coronary heart disease | Higher levels found in CHD | “Risk ratio for coronary heart disease; 1·81 (1·58–2·07)”(41) | High |
| Pulmonary disease | Levels increase due to RV dysfunction in more severe cases of COPD for instance | “The accuracy of NP to diagnose HF is unchanged in the presence of pre-existing pulmonary disease.”(35) | High |
| ANRI (Sacubitril-Valsartan) use | Levels of BNP increase with ANRI-use | - | Treatment of HF, so not relevant in our population |
| Myocardial infarction | Higher levels found in MI | - | More prevalent in acute setting, less relevant in our population |

AF, atrial fibrillation; ANHA, *Academisch Netwerk Huisartsgeneeskunde Amsterdam UMC*; ANRI, angiotensin receptor neprilysin inhibitor; BNP, brain natriuretic peptide; CHD, coronary heart disease; COPD, chronic obstructive pulmonary disease; eGFR, estimated glomerular filtration rate; HF, heart failure; MI, myocardial infarction; MR-proANP, mid-regional pro-atrial natriuretic peptide; NT-proBNP, N-terminal proBNP; RV, right ventricle; SD, standard deviation; VHD, valvular heart disease

**Supplemental Table S3. Identification of determinants for personalized thresholds – Step 2: HF risk factor selection process.** Four prediction models for primary care on the left, on the right the included predictors per model.

| **Risk prediction model** | **Predictors in model** |
| --- | --- |
| **ARIC (15)** | age, race, sex, prevalent CHD, systolic blood pressure, use of blood pressure-lowering medication, diabetes, smoking status, heart rate, and body mass index (+NT-proBNP) |
| **Kaiser Permanente (16)** | age, hypertension, diabetes mellitus, coronary artery disease, atrial fibrillation, and valvular heart disease (models divided by sex and in- or outpatient) |
| **REFER (MICE) (14)** | sex, myocardial infarction, crepitations, edema, (+NT-proBNP) |
| **TARGET-HF (13)** | sex and age, tobacco use, alcohol abuse, obesity, material deprivation (poverty/financial issues), family history of cardiovascular disease, hypertension, diabetes mellitus, coronary artery disease, atrial fibrillation, heart murmur, valvular heart disease, stroke, chronic obstructive pulmonary disease, and chronic kidney disease. |

ARIC, Atherosclerosis Risk in Communities; CHD, coronary heart disease; MICE, Male, Infarction, Crepitations, Edema; NT-proBNP, N-terminal proBNP; REFER, Primary care REFerral for EchocaRdiogram; TARGET-HF, TARGET-HF model for incident heart failure in general practice using routine health care data.

**Supplemental Table S4. Identification of determinants for personalized thresholds – Step 3: HF risk factor selection process.** Risk factors for HF according to 4 risk prediction models used in primary care with readily available predictors (see Supplemental Table 3). Number of times mentioned in different prediction models, hazard ratio (HR) with 95% confidence intervals found in TARGET-HF study and a systematic review by Yang et al., prevalence as seen in HF patients from the ANHA-cohort, and whether the variable was included into our analyses on personalized thresholds.

| Risk factor | N of study mentions | HR in TARGET-HF (95%CI) | Adjusted HR in Yang (42), 2015 (95% CI) | Prevalence in ANHA cohort within HF patients (%) | Used in our personalized thresholds analyses |
| --- | --- | --- | --- | --- | --- |
| Male sex | ++++ | 1.28 (1.13-1.46) | 1.51 (1.32-1.72) |  | + |
| Age (per 10-year increase) | +++ | 1.96 (1.85-2.07) | 1.70 (1.33-2.16) | N/A | + |
| Hypertension | +++ | 1.09 (0.96-1.24) | 1.79 (1.41-2.27) | 51.23 | + |
| AF | ++ | 2.19 (1.80-2.45) | 1.88 (1.60-2.21) | 24.90 | + |
| MI | ++ | 1.52 (1.32-1.74) | 2.90 (1.85-4.54) | 30.26 | + |
| Valvular heart disease | ++ | 1.75 (1.45-2.11) | 1.74 (1.07-2.84) | 12.51 | + |
| Diabetes Mellitus | ++ | 1.44 (1.27-1.65) | 1.94 (1.71-2.19) | 28.56 | + |
| Tobacco use | ++ | N/A | 1.65 (1.45-1.88) | 8.41 |  |
| Obesity/BMI | ++ | 1.10 (0.89-1.36) | 1.21 (1.10-1.33) | 9.00 | + |
| Family history of CVD | + | N/A | N/A | 0.70 |  |
| Material deprivation | + | 0.75 (0.35-1.63) | N/A | 0.95 |  |
| Alcohol abuse |  | 1.55 (1.17-2.06) | N/A | 4.58 |  |
| Stroke | + | 1.14 (0.93-1.40) | N/A | 11.14 |  |
| COPD | + | 1.47 (1.26-1.73) | N/A | 16.28 | + |
| CKD | + | 1.21 (1.02-1.43) | N/A | 20.10 | + |
| Heart murmur | + | 1.42 (0.80-2.52) | N/A | 1.33 |  |
| Heart rate | + | N/A | N/A | N/A |  |
| Systolic blood pressure | + | N/A | N/A | N/A |  |
| Edema | + | N/A | N/A | N/A |  |
| Crepitations | + | N/A | N/A | N/A |  |
| Race (black) | + | N/A | N/A | N/A |  |

AF, atrial fibrillation; BMI, body mass index; CKD, chronic kidney disease; COPD, chronic obstructive pulmonary disease; CVD, cardiovascular disease; HR, hazard ration; MI, myocardial infarction; N/A, not available; TARGET-HF, TARGET-HF model for incident heart failure in general practice using routine health care data.

**Supplemental Table S5.** **Univariate analyses of BNP.** For predictors cut-offs are presented for patients with and without the predictor present and calculated in the training set. Sensitivity, PPV, specificity and NPV for ESC cut-off and predictor specific split cut-offs are calculated in the test-set. For predictors the difference in test characteristics compared to test characteristics of ESC cut-off is presented. 95% confidence intervals are in brackets. P-value of permutation test is calculated, when significant after Bonferonni correction an asterisk (*) is added.

| Variable for threshold | Threshold with | Threshold without | p-value | Sensitivity | PPV | Specificity | NPV |
| --- | --- | --- | --- | --- | --- | --- | --- |
| *ESC guidelines* | **<35** | **<35** | **N/A** | **85.48 (81.86 to 89.27)** | **8.47 (7.28 to 10.22)** | **56.33 (54.19 to 57.82)** | **98.8 (98.29 to 99.16)** |
| *Male* | 35.8 (13.8 to 84.0) | 53.1 (30.0 to 77.0) | 0.0078 | -1.61 (-4.4 to 0.0) | 1.57 (1.15 to 1.97) | 8.16 (6.76 to 9.17) | 0.03 (-0.22 to 0.24) |
| *Age >75* | 29.4 (10.4 to 62.0) | 71.5 (34.6 to 135.0) | 0.0055 | 0.0 (0.0 to 0.0) | 2.39 (2.13 to 3.24) | 10.52 (9.61 to 12.21) | 0.19 (0.1 to 0.33) |
| *Myocardial infarction* | 32.3 (10.4 to 79.0) | 44.6 (38.1 to 69.2) | 0.0168 | 0.0 (0.0 to 0.0) | 1.33 (1.06 to 1.51) | 6.48 (5.67 to 7.14) | 0.12 (0.07 to 0.17) |
| *Atrial fibrillation* | 20.9 (10.4 to 86.5) | 49.0 (38.1 to 75.0) | 0.0001* | -1.61 (-3.03 to 0.0) | 1.89 (1.66 to 2.21) | 9.38 (7.81 to 10.5) | 0.06 (-0.09 to 0.2) |
| *Valvular heart disease* | 64.5 (10.4 to 131.5) | 42.4 (38.1 to 55.0) | 0.0004* | 0.0 (0.0 to 0.0) | 1.46 (1.25 to 1.71) | 7.01 (6.25 to 7.58) | 0.13 (0.1 to 0.22) |
| *Hypertension* | 37.5 (27.0 to 62.0) | 54.9 (31.1 to 84.0) | 0.0424 | -1.61 (-4.12 to 0.0) | 1.38 (0.86 to 1.75) | 7.39 (5.99 to 7.93) | 0.02 (-0.24 to 0.18) |
| *COPD* | 23.5 (10.0 to 48.0) | 56.8 (38.1 to 79.6) | <0.0001* | -3.23 (-6.3 to 1.76) | 1.69 (1.01 to 2.2) | 9.3 (8.47 to 10.3) | -0.06 (-0.25 to 0.37) |
| *Diabetes mellitus* | 26.0 (10.4 to 41.5) | 67.6 (45.0 to 103.0) | 0.0001* | 0.0 (0.0 to 0.0) | 2.83 (2.21 to 3.53) | 11.97 (9.98 to 12.87) | 0.21 (0.09 to 0.25) |
| *Chronic kidney disease* | 27.9 (10.4 to 45.0) | 44.7 (38.1 to 62.0) | 0.039 | 0.0 (0.0 to 0.0) | 1.26 (0.81 to 1.55) | 6.17 (5.13 to 6.8) | 0.12 (0.08 to 0.17) |
| *Obesity* | 45.9 (10.4 to 113.0) | 43.7 (34.6 to 75.0) | 0.0076 | 0.0 (0.0 to 0.0) | 1.42 (1.16 to 1.57) | 6.86 (5.95 to 7.44) | 0.13 (0.09 to 0.18) |

ESC, European Society of Cardiology; COPD, chronic obstructive pulmonary disease; N/A, not applicable; NPV, negative predictive value; PPV, positive predictive value.

**Supplemental Table S6.** **Univariate analyses of NT-proBNP.** For predictors cut-offs are presented for patients with and without the predictor present and calculated in the training set. Sensitivity, PPV, specificity and NPV for ESC cut-off and predictor specific split cut-offs are calculated in the test-set. For predictors the difference in test characteristics compared to test characteristics of ESC cut-off is presented. 95% confidence intervals are in brackets. P-value of permutation test is calculated, when significant after Bonferonni correction an asterisk (*) is added.

| NTproBNP | Threshold with | Threshold without | p-value | Sensitivity | PPV | Specificity | NPV |
| --- | --- | --- | --- | --- | --- | --- | --- |
| *ESC* | **<125** | **<125** | **NaN** | **94.74 (92.64 to 98.58)** | **12.64 (11.23 to 14.28)** | **60.58 (59.55 to 62.85)** | **99.48 (99.32 to 99.87)** |
| *Male* | 126.9 (101.0 to 144.1) | 140.6 (135.6 to 178.0) | 0.0198 | 0.0 (0.0 to 0.0) | 0.67 (0.47 to 0.94) | 2.28 (1.56 to 2.74) | 0.02 (0.01 to 0.03) |
| *Age >75* | 124.9 (46.0 to 161.0) | 150.3 (119.0 to 295.8) | 0.0078* | 0.0 (0.0 to 0.0) | 1.08 (0.8 to 1.29) | 3.55 (2.69 to 4.27) | 0.03 (0.02 to 0.05) |
| *Myocardial infarction* | 175.9 (46.0 to 406.8) | 131.1 (119.0 to 142.0) | 0.263 | 0.0 (0.0 to 0.0) | 0.63 (0.45 to 0.76) | 2.15 (1.56 to 2.73) | 0.02 (0.01 to 0.03) |
| *Atrial fibrillation* | 132.9 (63.6 to 383.0) | 133.4 (126.9 to 142.0) | 0.3886 | 0.0 (0.0 to 0.0) | 0.52 (0.43 to 0.65) | 1.77 (1.52 to 2.08) | 0.01 (0.0 to 0.03) |
| *Valvular heart disease* | 287.6 (13.6 to 444.0) | 132.2 (127.1 to 142.4) | 0.0036* | -1.05 (-3.89 to 0.0) | 0.72 (0.43 to 0.87) | 2.85 (2.3 to 3.54) | -0.08 (-0.32 to 0.02) |
| *Hypertension* | 141.6 (135.6 to 215.3) | 132.5 (112.0 to 151.3) | 0.0208 | 0.0 (0.0 to 0.0) | 0.75 (0.61 to 1.04) | 2.53 (2.05 to 3.23) | 0.02 (0.01 to 0.03) |
| *COPD* | 137.8 (40.0 to 379.0) | 141.4 (127.1 to 202.5) | 0.0025* | 0.0 (0.0 to 0.0) | 1.06 (0.9 to 1.29) | 3.49 (3.18 to 3.95) | 0.03 (0.02 to 0.06) |
| *Diabetes mellitus* | 126.5 (40.0 to 220.3) | 140.8 (119.0 to 215.3) | 0.0245 | 0.0 (0.0 to 0.0) | 0.75 (0.54 to 0.99) | 2.53 (2.21 to 3.31) | 0.02 (0.01 to 0.04) |
| *Chronic kidney disease* | 138.6 (127.1 to 244.9) | 136.1 (135.6 to 140.7) | 0.0214 | 0.0 (0.0 to 0.0) | 0.79 (0.7 to 0.98) | 2.66 (2.17 to 3.06) | 0.02 (0.01 to 0.03) |
| *Obesity* | 200.7 (75.4 to 822.0) | 132.3 (119.0 to 142.4) | 0.03 | 0.0 (0.0 to 0.0) | 0.91 (0.73 to 1.22) | 3.04 (2.43 to 4.0) | 0.02 (0.01 to 0.03) |

ESC, European Society of Cardiology; COPD, chronic obstructive pulmonary disease; N/A, not applicable; NPV, negative predictive value; PPV, positive predictive value.
